# Supplementary material for: Psychological effect of COVID-19 pandemic on healthcare professionals of Yemen and coping strategies
Source: Research Square preprint supplement (doi:10.21203/rs.3.rs-393255/v1), 2021-04-19
Supplement: Supplementary file 1 [file 4666b37d21ee6a735fa75774.docx]

**إستبــــانــة لبحــــث عــــــن**

**التأثير النفسي لكورونا كوفيد 19**

**على أخصائي الرعاية الصحية**

**وكيفية تعاملهم**

**هذا الإستبيان عمل لتقييم الأثر النفسي لمرض فيروس كوروناعلى العاملين في مجال الرعاية الصحية اليمنيين واستراتيجياتهم على التكيف، الدراسة لأغراض بحثية وسيتم التعامل مع جميع المعلومات المقدمة بمنتهى السرية**

**القسم الأول:**

العمر:.............................................

الجنس:

ذكر
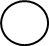
 انثى

الوظيفة:


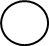
 دكتور
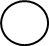
 ممرض
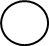
 صيدلاني


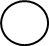
 مساعد طبيب
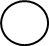
 أخرى

الخبرة :


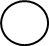
 أقل من 5 سنوات


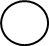
من 5-10 سنوات


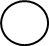
أكثر من 10 سنوات

مكان العمل ( مستشفى / مراكز صحية / منظمات صحية):


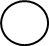
 المستشفيات - القطاع العام


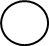
 المستشفيات - القطاع الخاص


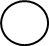
 صيدلية


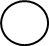
 منظمة صحية أخرى

المحافظة:


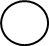
 عدن
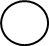
 حضرموت
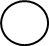
 تعز


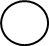
 الضالع
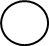
 مأرب
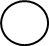
 صنعاء


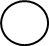
 اب
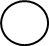
 أبين
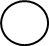
 ذمار


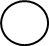
 حجة
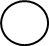
 المحويت
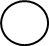
 المهرة


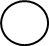
 شبوة
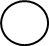
 لحج

في إي من المراكز التالية، أنت تقدم الرعاية الصحية للمرضى المصابين بفيروس كوفيد 19 ؟


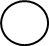
 منشأة الحجر الصحي


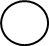
 جناح العزل


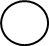
 وحدة العناية المركزة ل Covid-19


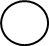
 غير قابل للتطبيق

هل تلقيت إي تدريب متعلق بفيروس كوفيد -19 ؟


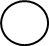
 نعم
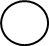
 لا

**القسم الثاني:**

على مدار الأشهر الثلاثة الماضية ، كم مرة أزعجتك المشكلات التالية؟

| المشـــــــــــــكلة | على الإطلاق | أقل من  أسبوع | أكثر من أسبوع | كل يوم تقريباً |
| --- | --- | --- | --- | --- |
| تشعر بالتوتر أو القلق |  |  |  |  |
| لا أملك القدرة على ان اكون قادراًعلى التوقف أو التحكم في القلق |  |  |  |  |
| تقلق كثيراً بشأن أشياء مختلفة |  |  |  |  |
| تواجه مشكلة في الإسترخاء |  |  |  |  |
| أن تكون قلقاً لدرجة أنه من الصعب البقاء ساكناً |  |  |  |  |
| الإنزعاج أو سرعة الإنفعال بسهولة |  |  |  |  |
| تشعر بالخوف وكأن شيئاً فظيعاً قد يحدث |  |  |  |  |
| القليل من الإهتمام أو المتعة في فعل الأشياء |  |  |  |  |
| الشعور بالإحباط أو الاكتئاب أو اليأس |  |  |  |  |
| تواجه صعوبة في النوم أو الاستمرار في النوم أو النوم كثيراً |  |  |  |  |
| الشعور بالتعب أو قلة الطاقة |  |  |  |  |
| ضعف الشهية أو الإفراط في الأكل |  |  |  |  |
| تشعر بالسوء تجاه نفسك أو أنك فاشل أو خذلت نفسك أو عائلتك |  |  |  |  |
| تواجه صعوبة في التركيز على أشياء مثل قراءة الجريدة أو مشاهدة التلفزيون |  |  |  |  |
| التحرك أو التحدث ببطئ شديد لدرجة أن الأخرين قد يلاحظونه. أو العكس - أن تكون مملاً جداً أو قلقاً لدرجة أنك تتحرك كثيراً أكثر من المعتاد؟ |  |  |  |  |
| أفكار انه من الأفضل لك أن تكون ميتاً أو أن تؤذي نفسك |  |  |  |  |
| إذا قمت بفحص أي مشاكل مذكوره سابقاً، ما مدى صعوبة ذلك بالنسبة لك للقيام بعملك ، أو الاعتناء بالأشياء في المنزل ، أو التعامل مع أشخاص آخرين؟ |  |  |  |  |

**القسم الثالث:**

مصدر الضيق/الحزن/ القلق

| مصدر الضيق/الحزن/ القلق | نعم | لا |
| --- | --- | --- |
| أشعر أنني قد أصاب بفيروس كوفيد-19 في إي لحظة |  |  |
| في بعض الأحيان ، أشعر أنني مصاب |  |  |
| أخشى إصابة أفراد عائلتي وأصدقائي |  |  |
| أخشى الذهاب إلى المستشفى |  |  |
| أشعر أن كوفيد-19 شديد العدوى |  |  |
| أشعر أن كوفيد -19 سيستمر في المجتمع اليمني لفترة طويلة جدًا |  |  |
| أشعر أن كوفيد-19 سهل الإنتشار ويصعب منعه |  |  |
| أشعر أنه من الصعب جداً علاج مرضى كوفيد-19 |  |  |
| أشعر أنه من الصعب السيطرة على وباء كوفيد-19 في اليمن |  |  |
| أنا قلق من تأثر العلاقة السيئة بيني وبين أفراد عائلتي / أصدقائي بسبب كوفيد-19 ؟ |  |  |
| أشعر أن الحكومة فشلت في تقديم معلومات كافية مناسبة وحقيقية |  |  |
| أشعر أن هناك نقصاً في معدات الحماية الكافية لمقدمي الرعاية الصحية |  |  |
| أشعر أن الفحصوصات التشخيصية على نطاق واسع لـكوفيد-19 لم يتم إجراؤها |  |  |
| أشعر أن كوفيد-19 يقيد علاقاتي الإجتماعية مع أصدقائي |  |  |
| أشعر أن كوفيد-19 قد قلب حياتي رأساً على عقب |  |  |

**القسم الرابع:**

استراتيجيات المواجهة

| الاستـــــــــــراتيجيـــــــــة | لا أفعل هذا  على الإطلاق | أفعل هذا  قليلاً | أفعل هذا  بشكل معتدل | أفعل هذا  كثيراً |
| --- | --- | --- | --- | --- |
| لقد تحولت إلى العمل أو الأنشطة الأخرى لإبعاد ذهني عن هذه الأمور |  |  |  |  |
| لقد كنت أركز جهودي على فعل شيء حيال الموقف الذي أنا فيه |  |  |  |  |
| كنت أقول لنفسي "هذا ليس حقيقياً" |  |  |  |  |
| لقد كنت استخدم الأدوية لأجعل نفسي أشعر بتحسن |  |  |  |  |
| لقد تلقيت الدعم العاطفي من الآخرين |  |  |  |  |
| لقد أستسلمت بمحاولة التعامل مع الفيروس |  |  |  |  |
| لقد أتخذت إجراءات لمحاولة تحسين الوضع |  |  |  |  |
| لقد كنت أرفض تصديق حدوث ذلك |  |  |  |  |
| لقد كنت أقول أشياء لاقنع مشاعري الغير المرغوبه تذهب |  |  |  |  |
| لقد تلقيت المساعدة والنصائح من أشخاص آخرين |  |  |  |  |
| لقد كنت استخدم الأدوية لمساعدتي في تجاوز الفيروس |  |  |  |  |
| لقد كنت أحاول رؤيته من منظور مختلف ، لجعله يبدو أكثر إيجابية |  |  |  |  |
| لقد كنت أنتقد نفسي. |  |  |  |  |
| لقد كنت أحاول التوصل إلى استراتيجية حول ما يجب القيام به |  |  |  |  |
| لقد حصلت على الراحة والتفهم من شخص ما |  |  |  |  |
| لقد كنت أتخلى عن محاولة التأقلم |  |  |  |  |
| لقد كنت أبحث عن شيء جيد فيما يحدث |  |  |  |  |
| لقد كنت أطلق الدعابات عليها |  |  |  |  |
| لقد كنت أفعل شيئاً لأفكر فيه بشكل أقل ، مثل مشاهدة التلفزيون أو القراءة أو أحلام اليقظة أو النوم. |  |  |  |  |
| لقد كنت أتقبل حقيقة حدوث ذلك |  |  |  |  |
| لقد كنت أعبر عن مشاعري السلبية |  |  |  |  |
| كنت أحاول أن أجد الراحة في ديني أو معتقداتي الروحية |  |  |  |  |
| لقد كنت أحاول الحصول على النصائح أو المساعدة من أشخاص آخرين حول هذا الموضوع |  |  |  |  |
| لقد كنت أتعلم التعايش مع هذا الوضع |  |  |  |  |
| لقد كنت أفكر ملياً في الخطوات التي يجب إتخاذها |  |  |  |  |
| لقد كنت ألوم نفسي على الأشياء التي حدثت |  |  |  |  |
| لقد كنت أصلي أو أتأمل |  |  |  |  |
| لقد كنت أسخر من الموقف |  |  |  |  |
